# Supplementary material
Source: PubMed Central journal article supplement (PMC2712820)
Supplement: NIHMS45761-supplement-01.pdf [file NIHMS45761-supplement-01.pdf]

## Supplemental Data

### Riboswitches that Sense S-adenosylhomocysteine and Activate Genes Involved in Coenzyme Recycling

Joy Xin Wang, Elaine R. Lee, Dianali Rivera Morales, Jinsoo Lim, and Ronald R. Breaker

#### Supplemental Experimental Procedures

##### Identification and Unification of SAH Motif Structural Models

Although a previous bioinformatics search revealed the first representatives of SAH riboswitch candidates (Weinberg et al., 2007), a subsequent examination of bioinformatics hits (unpublished observations) uncovered a second putative RNA motif with gene associations similar to those for the SAH RNA motif described previously. Further analyses revealed that the predicted secondary structure for the original SAH motif could be reorganized to include a pseudoknot. The second collection of SAH RNA candidates also fit the revised structural model, thus unifying all hits into a single consensus sequence and structural class. This revised consensus pattern was used to search for more matches (see **Experimental Procedures**).

##### Bioinformatics

The initial seed alignments for the SAH aptamer were discovered using the CMfinder comparative genomics pipeline (Yao et al., 2007; Weinberg et al., 2007). After manual editing of the alignment, a probabilistic covariance model (CM) was derived and searched against microbial genomes and environmental sequences deposited in the NCBI RefSeq database (Pruitt et al., 2007), using the RAVE<sub>NNA</sub> extension (Weinberg and Ruzzo, 2006) to the Infernal software package (Eddy, 2003).

After each search iteration, non-duplicative new matches were manually aligned and examined. Only those that exhibit a reasonable genomic context and that could be fully aligned to known SAH aptamer examples were added to the seed alignment for

subsequent searching. Genomic context examination employed the COG database (Tatusov et al., 2003) to predict functions of ORFs. Due to limitations of CM searches, the pseudoknot structure was not enforced in the search, but rather checked afterwards during the manual examination process. To find more-divergent matches, local mode CM searches derived from seed alignments were also performed against a database comprising sequences in front of ORFs that are homologous to ORFs immediately downstream of known SAH aptamer representatives. Sequences that were high-scoring but partial matches were expanded to cover the whole conserved domain and were subjected to the same manual alignment/examination process as described for global searches.

Sequences in the final alignment were weighted according to their similarity using the Infernal software package's internal implementation of the Gerstein-Sonnhammer-Chothia algorithm (Gerstein et al., 1994) to reduce the bias caused by the existence of multiple strains of the same bacterial species that are present in the genomic sequence database. The conservation statistics and consensus were then calculated with consideration of the sequence weight. Separate weights and conservation statistics were calculated from subsets of the final alignment for regions with alternative structures.

Figure S1

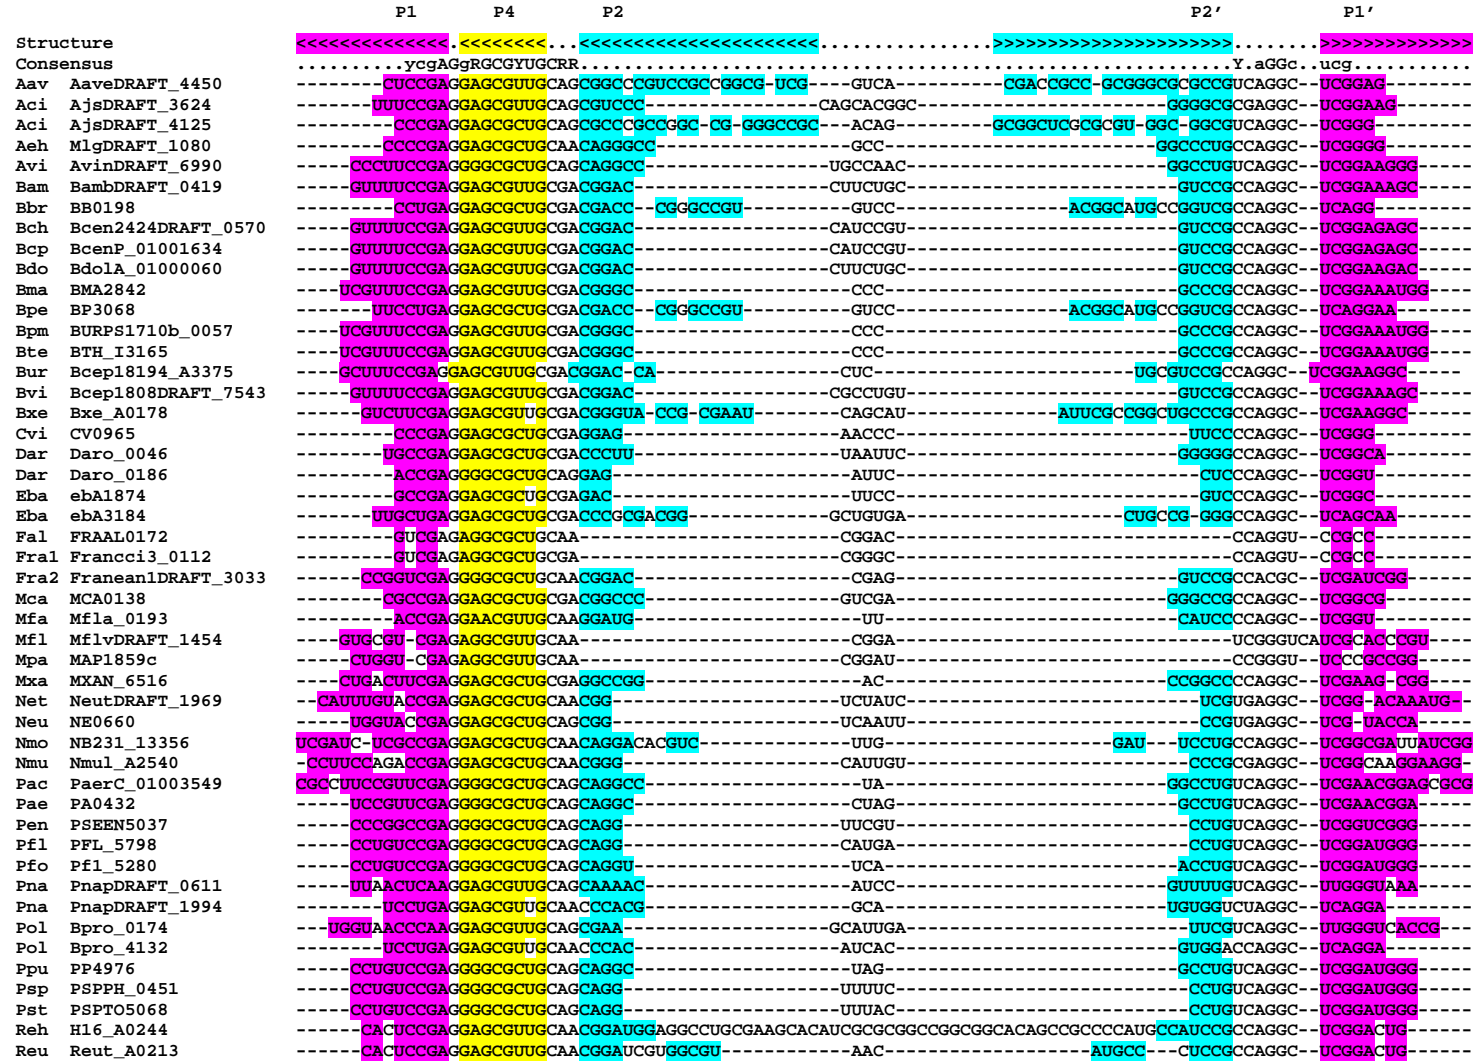

Figure S1, continued

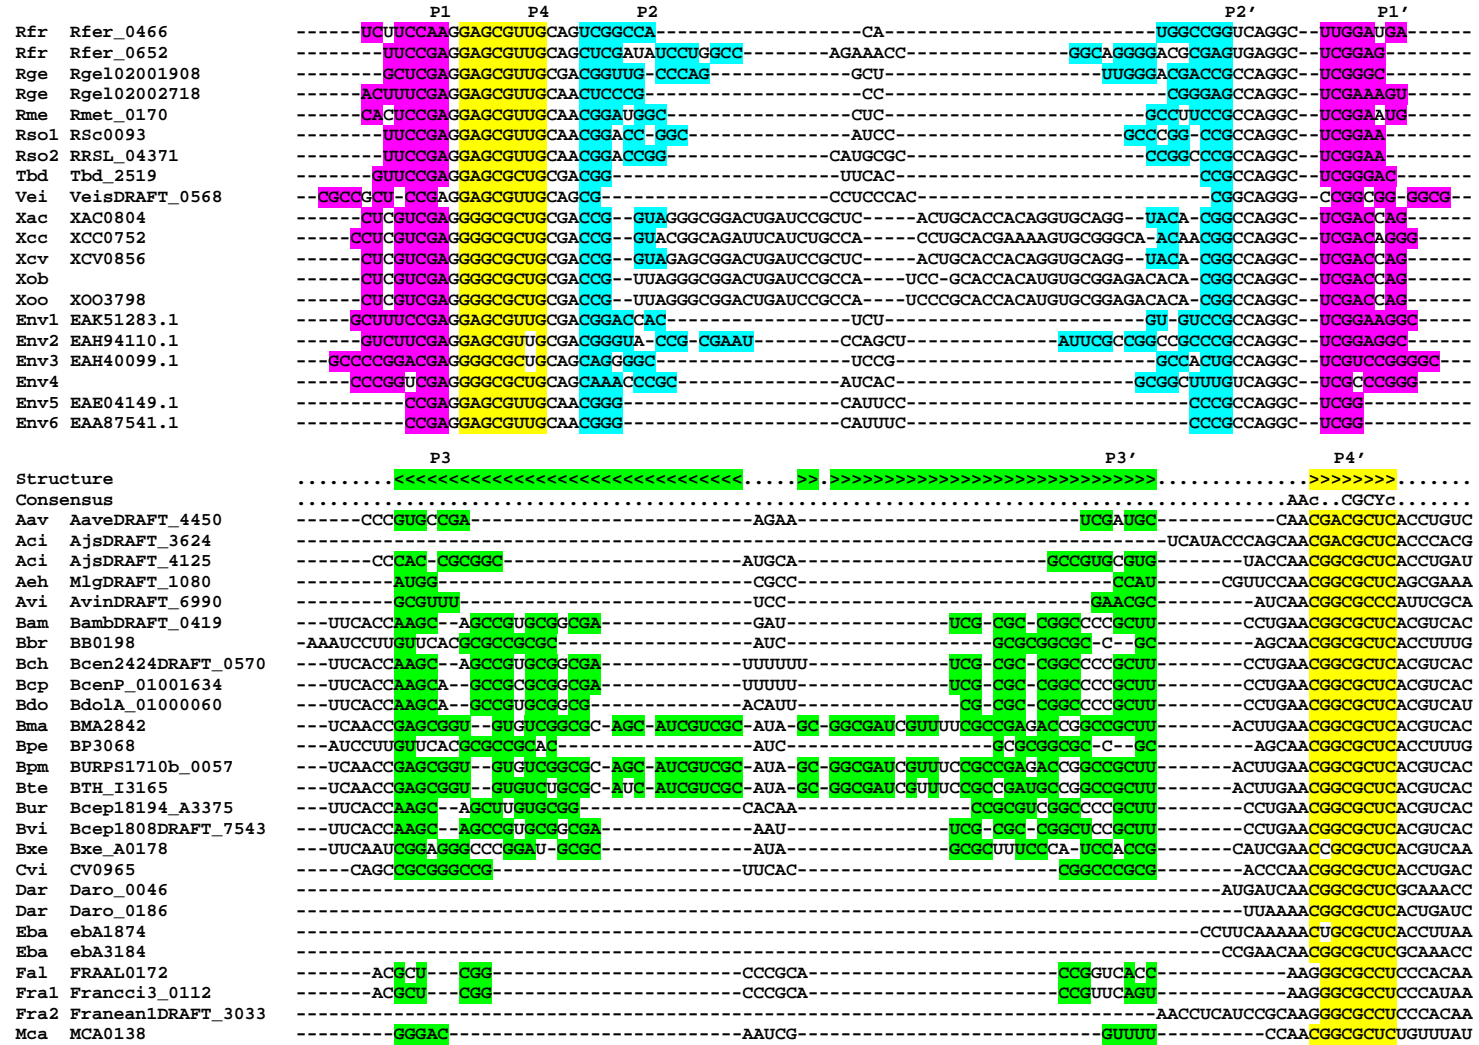

**Figure S1, continued**

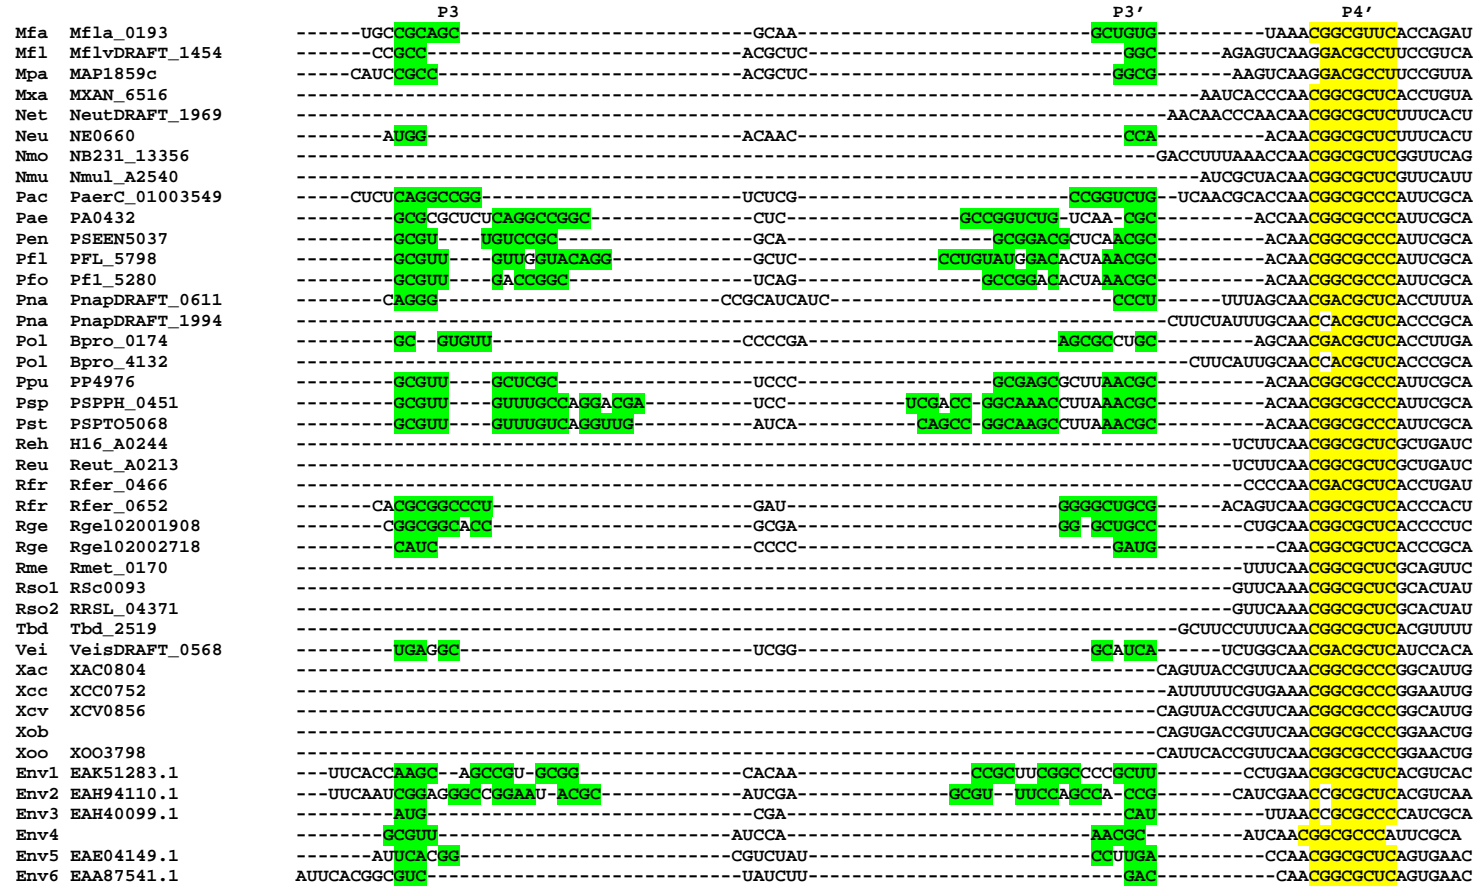

**Figure S1. Sequence Alignment of Nonduplicative SAH RNAs**

Predicted secondary structure elements are marked by brackets in the Structure row and are individually colored as follows: P1 (red), P4 pseudoknot (yellow), P2 (blue), and the optional P3 (green), where P represents “paired”. Conserved nucleotides are labeled in the consensus row as follows: >97% (uppercase) and >90% (lowercase), where R = A or G, and Y = C or U. A three-letter organism abbreviation (see **Figure S2** for the bacterial strain) is followed by the downstream gene’s locus tag from the original sequence file.

Figure S2 (next three pages)

| Abb  | Organism                                         | Accession/Start-End              |
|------|--------------------------------------------------|----------------------------------|
| Aav  | Acidovorax avenae subsp. citrulli AAC00-1        | NZ_AASX01000001.1/552959-552847  |
| Aci  | Acidovorax sp. JS42                              | NZ_AASD01000006.1/141640-141560  |
| Aci  | Acidovorax sp. JS42                              | NZ_AASD01000001.1/236118-236236  |
| Aeh  | Alkalilimnicola ehrlichei MLHE-1                 | NZ_AALK01000011.1/76195-76276    |
| Avi  | Azotobacter vinelandii AvOP                      | NZ_AA003000001.1/1647268-1647357 |
| Bam  | Burkholderia ambifaria AMMD                      | NZ_AAJL01000019.1/45329-45213    |
| Ebr  | Bordetella bronchiseptica RB50                   | NC_002927.3/203883-204000        |
| Bch  | Burkholderia cenocepacia HI2424                  | NZ_AAHL01000093.1/16213-16094    |
| Bcp  | Burkholderia cenocepacia PC184                   | NZ_AAKX01000047.1/2738-2856      |
| Bdo  | Burkholderia dolosa AU0158                       | NZ_AAKY01000006.1/6273-6157      |
| Ema  | Burkholderia mallei ATCC 23344                   | NC_006348.1/2934894-2934753      |
| Bpe  | Bordetella pertussis Tohama I                    | NC_002929.2/3271246-3271127      |
| Bpm  | Burkholderia pseudomallei 1710b                  | NC_007434.1/62267-62126          |
| Bte  | Burkholderia thailandensis E264                  | NC_007651.1/3610419-3610278      |
| Bur  | Burkholderia sp. 383                             | NC_007510.1/233787-233904        |
| Evi  | Burkholderia vietnamiensis G4                    | NZ_AAEH02000001.1/229831-229715  |
| Exe  | Burkholderia xenovorans LB400                    | NC_007951.1/4657558-4657422      |
| Cvi  | Chromobacterium violaceum ATCC 12472             | NC_005085.1/998460-998548        |
| Dar  | Dechloromonas aromatica RCB                      | NC_007298.1/57503-57435          |
| Dar  | Dechloromonas aromatica RCB                      | NC_007298.1/205030-204972        |
| Eba  | Azoarcus sp. EbN1                                | NC_006513.1/1088386-1088448      |
| Eba  | Azoarcus sp. EbN1                                | NC_006513.1/1900923-1901003      |
| Fal  | Frankia alni ACN14a                              | NC_008278.1/171653-171581        |
| Fra1 | Frankia sp. CoI3                                 | NC_007777.1/139089-139017        |
| Fra2 | Frankia sp. EANlpec                              | NZ_AAI101000057.1/13981-14057    |
| Mca  | Methylococcus capsulatus str. Bath               | NC_002977.6/144279-144199        |
| Mfa  | Methylobacillus flagellatus KT                   | NC_007947.1/205625-205548        |
| Mfl  | Mycobacterium flavescens PYR-GCK                 | NZ_AAPA01000012.1/130354-130275  |
| Mpa  | Mycobacterium avium subsp. paratuberculosis K-10 | NC_002944.2/2041607-2041528      |
| Mxa  | Myxococcus xanthus DK 1622                       | NC_008095.1/8035797-8035872      |
| Net  | Nitrosomonas eutropha C71                        | NZ_AAJE01000001.1/19337-19257    |
| Neu  | Nitrosomonas europaea ATCC 19718                 | NC_004757.1/715035-715112        |
| Nmo  | Nitrococcus mobilis Nb-231                       | NZ_AAOP01000009.1/53447-53352    |
| Nmu  | Nitrosospira multiformis ATCC 25196              | NC_007614.1/2909970-2909888      |
| Pac  | Pseudomonas aeruginosa C3719                     | NZ_AAKV01000077.1/22341-22452    |
| Pae  | Pseudomonas aeruginosa PAO1                      | NC_002516.2/484244-484138        |
| Pen  | Pseudomonas entomophila L48                      | NC_008027.1/5348241-5348337      |
| Pfl  | Pseudomonas fluorescens Pf-5                     | NC_004129.6/6604863-6604970      |
| Pfo  | Pseudomonas fluorescens PFO-1                    | NC_007492.1/5940641-5940740      |
| Pna  | Polaromonas naphthalenivorans CJ2                | NZ_AANM01000024.1/33980-33887    |
| Pna  | Polaromonas naphthalenivorans CJ2                | NZ_AANM01000014.1/106477-106405  |
| Pol  | Polaromonas sp. JS666                            | NC_007948.1/188517-188613        |
| Pol  | Polaromonas sp. JS666                            | NC_007948.1/4339041-4338971      |
| Ppu  | Pseudomonas putida KT2440                        | NC_002947.3/5667867-5667964      |
| Psp  | Pseudomonas syringae pv. phaseolicola 1448A      | NC_005773.3/515372-515261        |
| Pst  | Pseudomonas syringae pv. tomato str. DC3000      | NC_004578.1/5771305-5771415      |
| Reh  | Ralstonia eutropha H16                           | NC_008313.1/256130-256245        |
| Reu  | Ralstonia eutropha JMP134                        | NC_007347.1/239471-239552        |

|      |                                                       |                                 |
|------|-------------------------------------------------------|---------------------------------|
| Rfr  | Rhodoferax ferrireducens T118                         | NC_007908.1/475493-475563       |
| Rfr  | Rhodoferax ferrireducens T118                         | NC_007908.1/675989-676101       |
| Rge  | Rubrivivax gelatinosus FM1                            | NZ_AAEM01000003.1/306484-306386 |
| Rge  | Rubrivivax gelatinosus FM1                            | NZ_AAEM01000006.1/168890-168967 |
| Rme  | Ralstonia metallidurans CH34                          | NC_007973.1/177418-177491       |
| Rso1 | Ralstonia solanacearum GMI1000                        | NC_003295.1/107655-107582       |
| Rso2 | Ralstonia solanacearum UW551                          | NZ_AAKL01000003.1/110952-111026 |
| Tbd  | Thiobacillus denitrificans ATCC 25259                 | NC_007404.1/2591666-2591597     |
| Vei  | Verminephrobacter eiseniae EPF01-2                    | NZ_AASQ01000026.1/18922-19012   |
| Xac  | Xanthomonas axonopodis pv. citri str. 306             | NC_003919.1/955568-955456       |
| Xcc  | Xanthomonas campestris pv. campestris str. ATCC 33913 | NC_003902.1/900295-900180       |
| Xcv  | Xanthomonas campestris pv. vesicatoria str. 85-10     | NC_007508.1/977023-976911       |
| Xob  | Xanthomonas oryzae pv. oryzicola BLS256               | NZ_AAQN01000001.1/878107-877993 |
| Xoo  | Xanthomonas oryzae pv. oryzae KACC10331               | NC_006834.1/4051725-4051840     |
| Env1 | Environmental sequence                                | AACY01007480.1/48341-48457      |
| Env2 | Environmental sequence                                | AACY01119115.1/4057-4193        |
| Env3 | Environmental sequence                                | AACY01168624.1/789-874          |
| Env4 | Environmental sequence                                | AACY01215322.1/604-697          |
| Env5 | Environmental sequence                                | AACY01482824.1/508-429          |
| Env6 | Environmental sequence                                | AACY01802862.1/608-686          |

| Abb  | Organism                                         | Operon             |         |                    |         |                    |         |                |         |                   |
|------|--------------------------------------------------|--------------------|---------|--------------------|---------|--------------------|---------|----------------|---------|-------------------|
| Aav  | Acidovorax avenae subsp. citrulli AAC00-1        | AaveDRAFT_4450     | COG1410 |                    |         |                    |         |                |         |                   |
| Aci  | Acidovorax sp. JS42                              | AjsDRAFT_3624      | COG0499 | AjsDRAFT_3623      | COG1189 | AjsDRAFT_3622      | COG0685 | AjsDRAFT_3621  | N/A     |                   |
| Aci  | Acidovorax sp. JS42                              | AjsDRAFT_4125      | COG1410 | AjsDRAFT_4126      | COG2989 | AjsDRAFT_4127      | COG3108 |                |         |                   |
| Aeh  | Alkalilimnicola ehrlichei MLHE-1                 | MlgDRAFT_1080      | COG0499 | MlgDRAFT_1081      | COG0685 | MlgDRAFT_1082      | COG4067 | MlgDRAFT_1083  | COG0189 |                   |
| Avi  | Azotobacter vinelandii AvOP                      | AvinDRAFT_6990     | COG0499 | AvinDRAFT_6991     | COG0685 |                    |         |                |         |                   |
| Bam  | Burkholderia ambifaria AMMD                      | BambDRAFT_0419     | COG0499 | BambDRAFT_0418     | COG1950 | BambDRAFT_0417     | COG0685 |                |         |                   |
| Bbr  | Bordetella bronchiseptica RB50                   | BB0198             | COG0499 | BB0199             | N/A     | BB0200             | COG0685 |                |         |                   |
| Bch  | Burkholderia cenocepacia HI2424                  | Bcen2424DRAFT_0570 | COG0499 | Bcen2424DRAFT_0569 | COG1950 | Bcen2424DRAFT_0568 | COG0685 |                |         |                   |
| Bcp  | Burkholderia cenocepacia PC184                   | BcenP_01001634     | COG0499 | BcenP_01001635     | COG1950 | BcenP_01001636     | COG0685 |                |         |                   |
| Bdo  | Burkholderia dolosa AU0158                       | Bdola_01000060     | COG0499 | Bdola_01000059     | COG1950 | Bdola_01000058     | COG0685 |                |         |                   |
| Bma  | Burkholderia mallei ATCC 23344                   | BMA2842            | COG0499 | BMA2841            | COG1950 | BMA2840            | COG0685 |                |         |                   |
| Bpe  | Bordetella pertussis Tohama I                    | BP3068             | COG0499 | BP3067             | N/A     | BP3066             | COG0685 | BP3065         | COG3415 |                   |
| Bpm  | Burkholderia pseudomallei 1710b                  | BURPS1710b_0057    | COG0499 | BURPS1710b_0056    | COG1950 | BURPS1710b_0055    | COG0685 |                |         |                   |
| Bth  | Burkholderia thailandensis E264                  | BTH_I3165          | COG0499 | BTH_I3164          | COG1950 | BTH_I3163          | COG0685 |                |         |                   |
| Bur  | Burkholderia sp. 383                             | Bcep18194_A3375    | COG0499 | Bcep18194_A3376    | COG1950 | Bcep18194_A3377    | COG0685 |                |         |                   |
| Bvi  | Burkholderia vietnamiensis G4                    | Bcep1808DRAFT_7543 | COG0499 | Bcep1808DRAFT_7542 | COG1950 | Bcep1808DRAFT_7541 | COG0685 |                |         |                   |
| Bxe  | Burkholderia xenovorans LB400                    | Bxe_A0178          | COG0499 | Bxe_A0179          | COG1950 | Bxe_A0180          | COG0685 |                |         |                   |
| Cvi  | Chromobacterium violaceum ATCC 12472             | CV0965             | COG0499 | CV0966             | COG0685 | CV0967             | COG2862 |                |         |                   |
| Dar  | Dechloromonas aromatica RCB                      | Daro_0046          | COG1410 |                    |         |                    |         |                |         |                   |
| Dar  | Dechloromonas aromatica RCB                      | Daro_0186          | COG0499 | Daro_0185          | COG1950 | Daro_0184          | COG1189 | Daro_0183      | COG0685 |                   |
| Eba  | Azoarcus sp. EbN1                                | eba1874            | COG0499 | eba1875            | COG0685 | eba1878            | COG4454 | eba1879        | N/A     |                   |
| Eba  | Azoarcus sp. EbN1                                | eba3184            | COG1410 |                    |         |                    |         |                |         |                   |
| Fal  | Frankia alni ACN14a                              | FRAAL0172          | COG1410 |                    |         |                    |         |                |         |                   |
| Fra1 | Frankia sp. CoI3                                 | Francci3_0112      | COG1410 | Francci3_0111      | N/A     |                    |         |                |         |                   |
| Fra2 | Frankia sp. EAN1pec                              | Franean1DRAFT_3033 | COG1410 |                    |         |                    |         |                |         |                   |
| Mca  | Methylococcus capsulatus str. Bath               | MCA0138            | COG0499 | MCA0137            | COG0685 |                    |         |                |         |                   |
| Mfa  | Methylobacillus flagellatus KT                   | Mfla_0193          | COG0499 | Mfla_0192          | N/A     | Mfla_0191          | COG0685 |                |         |                   |
| Mfl  | Mycobacterium flavescens PYR-GCK                 | MflvDRAFT_1454     | COG1410 | MflvDRAFT_1453     | COG0637 |                    |         |                |         |                   |
| Mpa  | Mycobacterium avium subsp. paratuberculosis K-10 | MAP1859c           | COG1410 |                    |         |                    |         |                |         |                   |
| Mxa  | Myxococcus xanthus DK 1622                       | MXAN_6516          | COG0499 |                    |         |                    |         |                |         |                   |
| Net  | Nitrosomonas eutropha C71                        | NeutDRAFT_1969     | COG0499 | NeutDRAFT_1968     | COG0685 |                    |         |                |         |                   |
| Neu  | Nitrosomonas europaea ATCC 19718                 | NE0660             | COG0499 | NE0661             | COG0685 |                    |         |                |         |                   |
| Nmo  | Nitrococcus mobilis Nb-231                       | NB231_13356        | COG0499 |                    |         |                    |         |                |         |                   |
| Nmu  | Nitrospira multiformis ATCC 25196                | Nmul_A2540         | COG0499 | Nmul_A2539         | COG0685 |                    |         |                |         |                   |
| Pac  | Pseudomonas aeruginosa C3719                     | PaerC_01003549     | COG0499 | PaerC_01003550     | COG0317 | PaerC_01003551     | COG0685 | PaerC_01003552 | N/A     |                   |
| Pae  | Pseudomonas aeruginosa PA01                      | PA0432             | COG0499 | PA0431             | COG0317 | PA0430             | COG0685 | PA0429         | N/A     |                   |
| Pen  | Pseudomonas entomophila L48                      | PSEEN5037          | COG0499 | PSEEN5038          | COG0685 | PSEEN5039          | N/A     | PSEEN5040      | COG0834 |                   |
| Pfl  | Pseudomonas fluorescens Pf-5                     | PFL_5798           | COG0499 | PFL_5799           | COG0685 |                    |         |                |         |                   |
| Pfo  | Pseudomonas fluorescens PfO-1                    | Pfl_5280           | COG0499 | Pfl_5281           | COG0685 |                    |         |                |         |                   |
| Pna  | Polaromonas naphthalenivorans CJ2                | PnapDRAFT_0611     | COG1410 |                    |         |                    |         |                |         |                   |
| Pna  | Polaromonas naphthalenivorans CJ2                | PnapDRAFT_1994     | COG0499 | PnapDRAFT_1993     | COG1189 | PnapDRAFT_1992     | COG0685 | PnapDRAFT_1991 | N/A     |                   |
| Pol  | Polaromonas sp. JS666                            | Bpro_0174          | COG1410 |                    |         |                    |         |                |         |                   |
| Pol  | Polaromonas sp. JS666                            | Bpro_4132          | COG0499 | Bpro_4131          | COG1189 | Bpro_4130          | COG0685 | Bpro_4129      | N/A     | Bpro_4128 COG0346 |
| Ppu  | Pseudomonas putida KT2440                        | PP4976             | COG0499 | PP4977             | COG0685 | PP4978             | N/A     |                |         |                   |
| Psp  | Pseudomonas syringae pv. phaseolicola 1448A      | PSPPH_0451         | COG0499 | PSPPH_0450         | COG0685 |                    |         |                |         |                   |
| Pst  | Pseudomonas syringae pv. tomato str. DC3000      | PSPT05068          | COG0499 | PSPT05069          | COG0685 |                    |         |                |         |                   |
| Reh  | Ralstonia eutropha H16                           | H16_A0244          | COG0499 | H16_A0245          | COG1950 | H16_A0246          | COG0685 | H16_A0247      | COG3070 | H16_A0248 COG1656 |

|      |                                                       |                |         |                |         |                |         |                |         |            |         |
|------|-------------------------------------------------------|----------------|---------|----------------|---------|----------------|---------|----------------|---------|------------|---------|
| Reu  | Ralstonia eutropha JMP134                             | Reut_A0213     | COG0499 | Reut_A0214     | COG1950 | Reut_A0215     | COG0685 | Reut_A0216     | COG3070 | Reut_A0217 | COG1656 |
| Rfr  | Rhodospirillum rubrum T118                            | Rfer_0466      | COG1410 |                |         |                |         |                |         |            |         |
| Rfr  | Rhodospirillum rubrum T118                            | Rfer_0652      | COG0499 | Rfer_0653      | COG1189 | Rfer_0654      | COG0685 |                |         |            |         |
| Rge  | Rubrivivax gelatinosus PM1                            | Rgel02001908   | COG1410 |                |         |                |         |                |         |            |         |
| Rge  | Rubrivivax gelatinosus PM1                            | Rgel02002718   | COG0499 | Rgel02002719   | COG1189 | Rgel02002720   | COG0685 |                |         |            |         |
| Rme  | Ralstonia metallidurans CH34                          | Rmet_0170      | COG0499 | Rmet_0171      | COG1950 | Rmet_0172      | COG0685 | Rmet_0173      | COG3070 | Rmet_0174  | COG1656 |
| Rso1 | Ralstonia solanacearum GMI1000                        | RSc0093        | COG0499 | RSc0092        | COG1950 | RSc0091        | COG0685 | RSc0090        | COG3070 |            |         |
| Rso2 | Ralstonia solanacearum UW551                          | RRSL_04371     | COG0499 | RRSL_04372     | COG1950 | RRSL_04373     | COG0685 | RRSL_04374     | COG3070 |            |         |
| Tbd  | Thiobacillus denitrificans ATCC 25259                 | Tbd_2519       | COG0499 | Tbd_2518       | N/A     | Tbd_2517       | COG0685 |                |         |            |         |
| Vei  | Verminephrobacter eiseniae EF01-2                     | VeisDRAFT_0568 | COG0499 | VeisDRAFT_0569 | COG1189 | VeisDRAFT_0570 | COG0685 | VeisDRAFT_0592 | N/A     |            |         |
| Xac  | Xanthomonas axonopodis pv. citri str. 306             | XAC0804        | COG0499 |                |         |                |         |                |         |            |         |
| Xcc  | Xanthomonas campestris pv. campestris str. ATCC 33913 | XCC0752        | COG0499 |                |         |                |         |                |         |            |         |
| Xcv  | Xanthomonas campestris pv. vesicatoria str. 85-10     | XCV0856        | COG0499 |                |         |                |         |                |         |            |         |
| Xob  | Xanthomonas oryzae pv. oryzicola BLS256               |                |         |                |         |                |         |                |         |            |         |
| Xoo  | Xanthomonas oryzae pv. oryzae KACC10331               | XOO3798        | COG0499 |                |         |                |         |                |         |            |         |
| Env1 | Environmental sequence                                | EAK51283.1     | COG0499 | EAK51284.1     | COG1950 | EAK51285.1     | COG0685 |                |         |            |         |
| Env2 | Environmental sequence                                | EAH94110.1     | COG0499 | EAH94111.1     | COG1950 | EAH94112.1     | COG0685 |                |         |            |         |
| Env3 | Environmental sequence                                | EAH40099.1     |         |                |         |                |         |                |         |            |         |
| Env4 | Environmental sequence                                |                |         |                |         |                |         |                |         |            |         |
| Env5 | Environmental sequence                                | EAE04149.1     | COG0499 |                |         |                |         |                |         |            |         |
| Env6 | Environmental sequence                                | EAA87541.1     | COG0499 |                |         |                |         |                |         |            |         |

| COG     | Gene                    | Description                                                                                                                                            |
|---------|-------------------------|--------------------------------------------------------------------------------------------------------------------------------------------------------|
| COG0499 | <i>sahH, ahcY, acyH</i> | S-adenosylhomocysteine hydrolase [Coenzyme metabolism]                                                                                                 |
| COG1410 | <i>metH</i>             | 5-methyltetrahydrofolate-homocysteine S-methyltransferase (COG: Methionine synthase I, cobalamin-binding domain [Amino acid transport and metabolism]) |
| COG0685 | <i>metF</i>             | 5,10-methylenetetrahydrofolate reductase [Amino acid transport and metabolism]                                                                         |
| COG1950 |                         | Predicted membrane protein [Function unknown]                                                                                                          |
| COG1189 |                         | Predicted rRNA methylase [Translation, ribosomal structure and biogenesis]                                                                             |
| COG3070 | <i>tfoX</i>             | Regulator of competence-specific genes [Transcription]                                                                                                 |
| COG1656 |                         | Uncharacterized conserved protein [Function unknown]                                                                                                   |
| COG0317 | <i>spoT</i>             | Guanosine polyphosphate pyrophosphohydrolases/synthetases [Signal transduction mechanisms / Transcription]                                             |

## Figure S2. SAH Element Locations and Associated Genes

GenBank accession numbers and nucleotide positions are indicated for each representative from **Figure S1**. Operons likely to be controlled by riboswitches are on the same strand downstream of an SAH element, and have a predicted SAH recycling function or are separated by fewer than 100 nucleotides. Gene locus tags and COG database assignments are provided for up to five genes for each putative operon. N/A: no conserved domain was found within the predicted ORF when searching against COG database. COGs appearing more than once are individually colored.



Figure S3

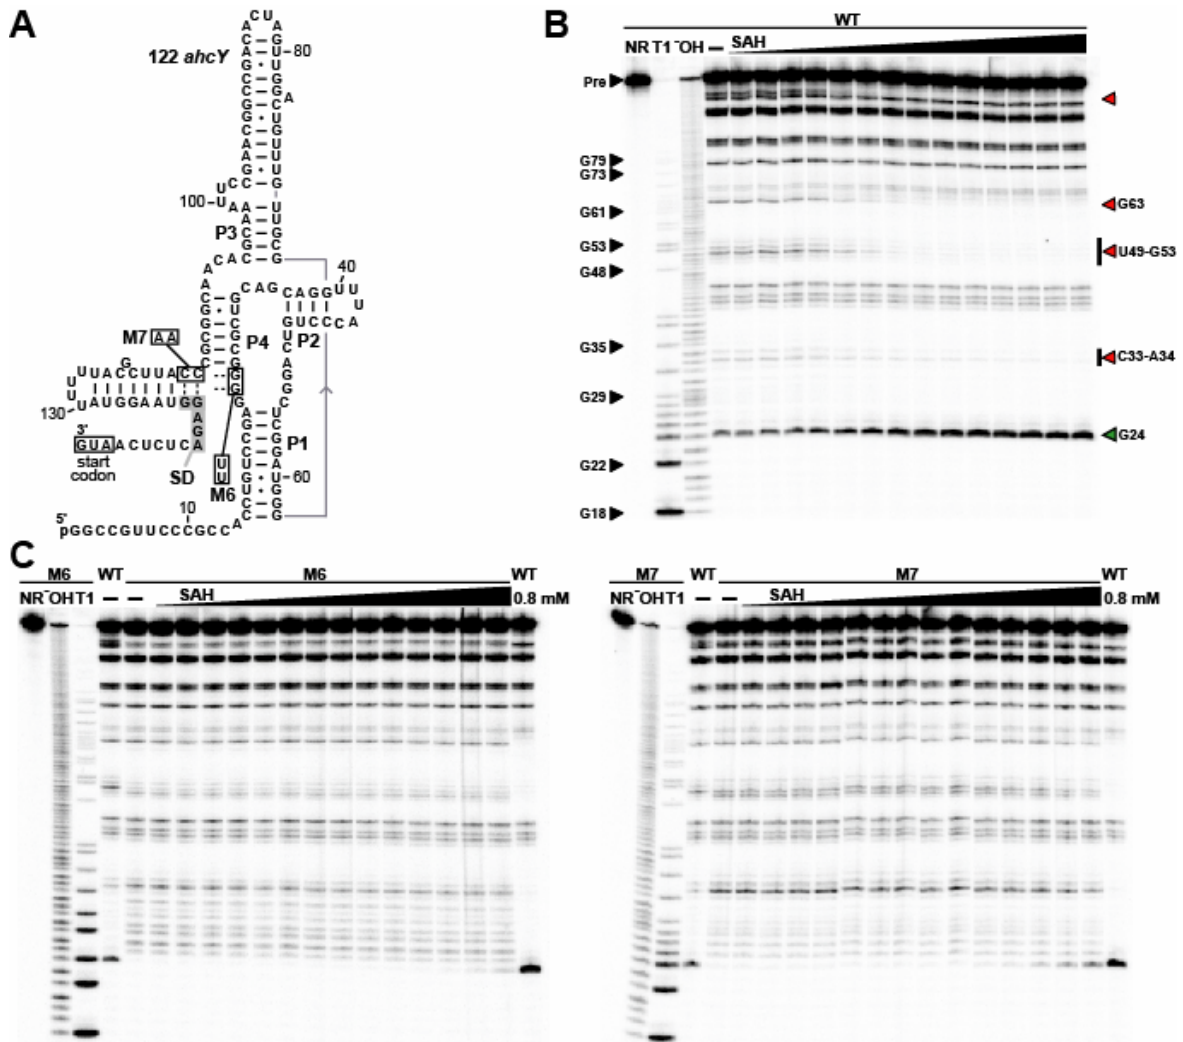

**Figure S3. Mutations M6 and M7 Have Similar Effects on Structure Formation of and SAH Binding by the 122 *ahcY* RNA**

(A) Sequence and secondary structure model of the 122 *ahcY* RNA, which encompasses an SAH aptamer. Two guanosyl residues were added to the 5' end to facilitate T7 *in vitro* transcription. Nucleotide changes to generate mutants M6 and M7 are indicated. The last 29 nucleotides of the construct depicted are not present in the 122 *ahcY* construct probed.

(B) Spontaneous cleavage patterns of the wild-type (WT) 122 *ahcY* RNA in the absence (–) or presence of SAH at concentrations ranging from 600 pM to 0.82 mM. Red and green arrowheads identify sites of ligand-mediated decreased or increased spontaneous cleavage, respectively. Other notations are as described in the legend to **Figure 3**.

(C) Spontaneous cleavage patterns of the mutant 122 *ahcY* RNAs M6 and M7 in the absence (–) or presence of SAH. Additional details are as described in **B**.

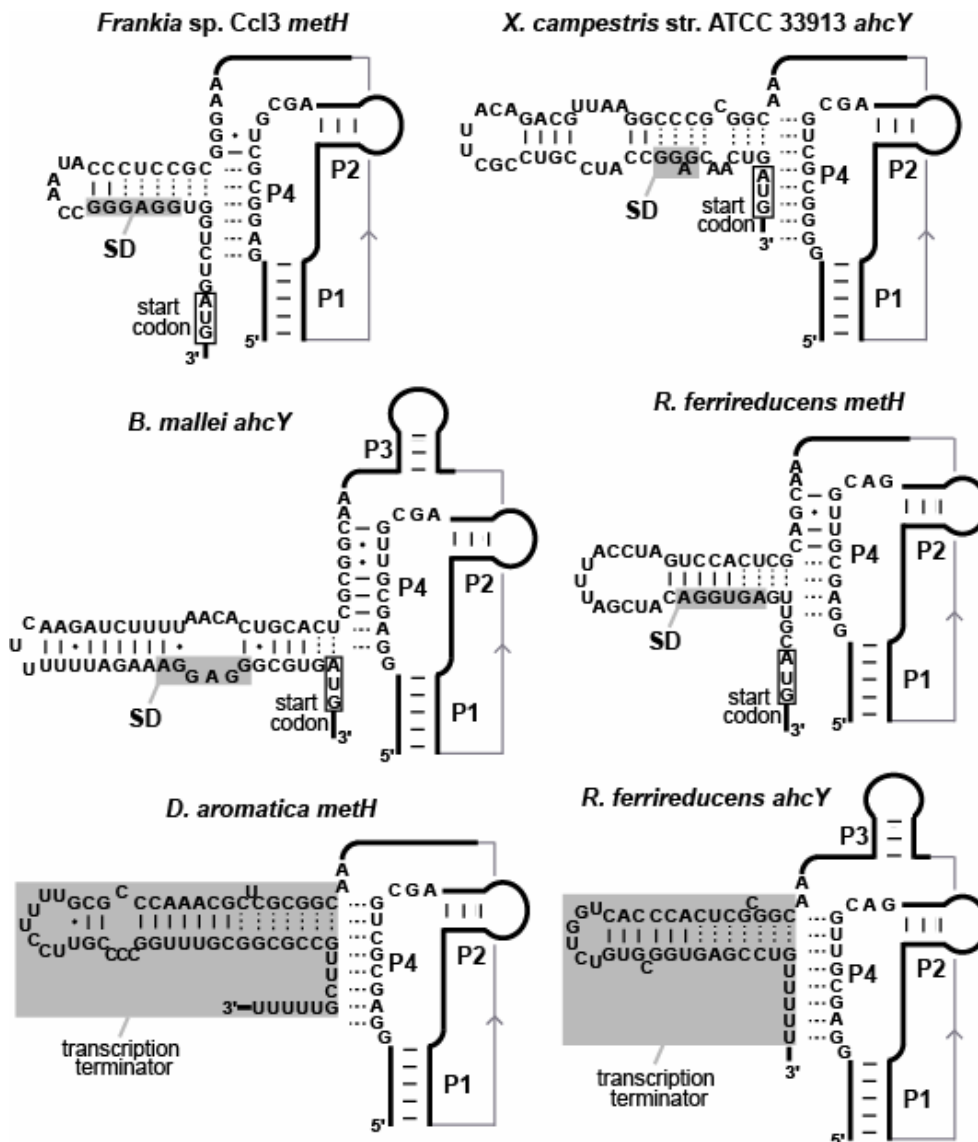

#### Figure S4. Predicted Expression Platform of Several SAH Riboswitches

Secondary structures of sequences downstream of SAH aptamers were predicted by the mfold (version 3.2) web server using default parameters (Zuker, 2003; Mathews et al., 1999). The transcription terminators (Gusarov and Nudler, 1999; Yarnell and Roberts, 1999) upstream of the *D. aromatica meth* and *R. ferrireducens ahcY* genes were predicted by TransTermHP (version 2.06) with confidence values of 100% and 75%, respectively (Kingsford et al., 2007). Dotted lines identify base pairing potential that could form stem P4 in the presence of SAH. The mfold algorithm can be found at <http://frontend.bioinfo.rpi.edu/applications/mfold/cgi-bin/rna-form1.cgi>.

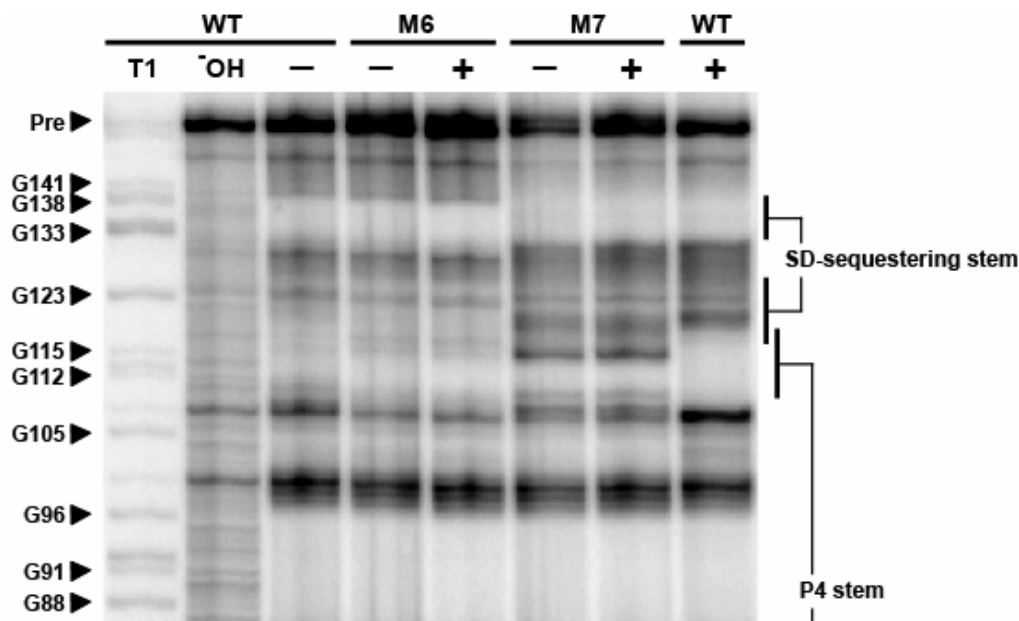

**Figure S5. Mutations M6 and M7 Disrupt SAH-Dependent Modulation of the Putative SD-Sequestering Stem in the 151 *ahcY* RNA**

In-line probing of the wild-type full-length 151 *ahcY* construct (WT) (see the construct depicted in Fig. S3A) reveals a pattern of spontaneous cleavage products that is consistent with the formation of the SD-sequestering stem in the absence (-) of SAH. The spontaneous cleavage pattern is consistent with SD-sequestering stem disruption in the presence (+) of 800  $\mu$ M SAH. Regardless of the presence or absence of SAH, the M6 version of this construct retains the spontaneous cleavage pattern observed for the WT RNA in the absence of ligand, indicating that the M6 RNA constantly forms the SD-sequestering stem. In contrast, the M7 RNA exhibits a pattern of spontaneous cleavage that indicates the RNA does not form the SD-sequestering stem either in the presence or absence of SAH. Furthermore, an increase in spontaneous cleavage near nucleotides 115 through 118 of the M7 construct suggests that this RNA also fails to fully form P4, as expected due to the mutation of the C residues at positions 117 and 118.

This interplay of alternative RNA folds is consistent with our hypothesis for the mechanism of gene control by the *ahcY* RNA. However, the in-line probing data indicate that the WT construct has a reduced level of spontaneous cleavage near the SD sequence despite disruption of the SD-sequestering stem in the presence of SAH. Likewise, the M7 construct exhibits a similar in-line probing pattern in this region. Since both constructs express high levels of a reporter gene (Fig. 6), either these constructs are misfolding near the 3' terminus due to the truncated RNAs used in these assays, or the mechanism of gene control is more complex than the mechanism proposed.

## Supplemental References

- Eddy, S.R. (2003). INFERNAL. Version 0.55. Distributed by the author. Dept. of Genetics, Washington University School of Medicine. St. Louis, Missouri.
- Gerstein, M., Sonnhammer, E.L.L., and Chothia, C. (1994). Volume changes in protein evolution. *J. Mol. Biol.* 236, 1067-1078.
- Kingsford, C., Ayanbule, K., and Salzberg, S.L. (2007) Rapid, accurate, computational discovery of Rho-independent transcription terminators illuminates their relationship to DNA uptake. *Genome Biol.* 8, R22.
- Mathews, D.H., Sabina, J., Zuker, M., and Turner, D.H. (1999). Expanded sequence dependence of thermodynamic parameters improves prediction of RNA secondary structure. *J. Mol. Biol.* 288, 911-940.
- Gusarov, I., and Nudler, E. (1999). The mechanism of intrinsic transcription termination. *Mol. Cell* 3, 495-504.
- Pruitt, K.D., Tatusova, T., and Maglott, D.R. (2007). NCBI reference sequences (RefSeq): a curated non-redundant sequence database of genomes, transcripts and proteins. *Nucleic Acids Research* 35, D61-D65.
- Tatusov, R.L., Fedorova, N.D., Jackson, J.D., Jacobs, A.R., Kiryutin, B., Koonin, E.V., Krylov, D.M., Mazumder, R., Mekhedov, S.L., Nikolskaya, A.N., *et al.* (2003). The COG database: an updated version includes eukaryotes. *BMC Bioinformatics* 4.
- Weinberg, Z., Barrick, J. E., Yao, Z., Roth, A., Kim, J.N., Gore, J., Wang, J.X., Lee, E.R., Block, K.F., Sudarsan, N., *et al.* (2007). Identification of 22 candidate structured RNAs in bacteria using the CMfinder comparative genomics pipeline. *Nucleic Acids Res.* (doi:10.1093).
- Weinberg, Z., and Ruzzo, W.L. (2006). Sequence-based heuristics for faster annotation of non-coding RNA families. *Bioinformatics* 22, 35-39.
- Yao, Z., Barrick, J.E., Weinberg, Z., Neph, S., Breaker, R.R., Tompa, M., and Ruzzo, W.L. (2007). A computational pipeline for high throughput discovery of *cis*-regulatory noncoding RNA in prokaryotes. *PLoS Comput. Biol.* 3, e126.
- Yarnell, W.S., and Roberts, J.W. (1999). Mechanism of intrinsic transcription termination and antitermination. *Science* 284, 611-615.
- Zuker, M. (2003). Mfold web server for nucleic acid folding and hybridization prediction. *Nucleic Acids Res.* 31, 3406-3415.
